# Supplementary material for: An MgV3O8 anode exhibiting enhanced rate capability and stability for lithium storage applications
Source: Royal Society of Chemistry journal article supplement (doi:10.1039/d4cc05716c), 2024-11-26
Supplement: d4cc05716c1.pdf [file d4cc05716c1.pdf]

*Electronic Supplementary Information (ESI)*

## MgV<sub>3</sub>O<sub>8</sub> Anode Exhibiting Enhanced Rate Capability and Stability for Lithium Storage Applications

Qi Wan,<sup>‡a</sup> Jie Zhao,<sup>‡a</sup> Xun Xu,<sup>a</sup> Hechao Xu,<sup>a</sup> Yu Liu,<sup>a</sup> Wenshu Li,<sup>a</sup> Qingchun Zhang,<sup>a</sup> Zhiqin Cao,<sup>\*b</sup> Xijun Wei,<sup>\*a</sup> and Yingze Song<sup>\*a</sup>

<sup>a</sup> State Key Laboratory of Environment-Friendly Energy Materials, School of Materials and Chemistry, Southwest University of Science and Technology, Mianyang, Sichuan 621010, P. R. China.

<sup>b</sup> College of Vanadium and Titanium, Panzhihua University, Panzhihua, Sichuan 617000, P. R. China.

Corresponding authors: cao\_zhi\_qing@163.com (Z. Cao), xijunwei1992@swust.edu.cn (X. Wei) and yzsong@swust.edu.cn (Y. Song).

**Keywords:** high-rate electrode materials, lithium-ion battery, solution combustion synthesis, MgV<sub>3</sub>O<sub>8</sub>

### 1. Experimental Section

#### 1.1 Synthesis of MgV<sub>3</sub>O<sub>8</sub>

In a typical route, 0.03 mol ammonium vanadate (NH<sub>4</sub>VO<sub>3</sub>) and 0.01 mol magnesium nitrate hexahydrate (6H<sub>2</sub>O·Mg(NO<sub>3</sub>)<sub>2</sub>) were dissolved in 40 mL deionized water using the stoichiometric ratio of Mg/V=1:3. Then, citric acid monohydrate (CAS) was added into this solution, with CAS : Mg : V=4:1:3 in mole ratio. The above solution vigorously stirred at 60 °C for 30 min. Stop stirring when the solution changed from orange-yellow to dark blue, the polybasic chelate solution was directly transferred to a resistance furnace in an air atmosphere at 450 °C. It took about 5 min to form gelatinous mass. Upon further heating, the resultant mass swelled suddenly accompanied by the release of a lot of gases, which resulted in large volume expansion of the precursor and

formation of bubble-like bulks. The black product after cooling with the furnace was  $\text{MgV}_3\text{O}_8$ .

### **1.2 Materials characterizations.**

The crystal structures of sample were detected by X-ray diffractometer (XRD, Bruker D Advance) and XRD patterns were obtained at a scan rate of  $1^\circ \text{ min}^{-1}$  with  $\text{Cu-K}\alpha$  radiation. The morphological characterizations of all samples were carried out by field emission scanning electron microscope (FESEM, ZEISS Sigma 300), and high-resolution transmission electron microscopy (HRTEM, JEOL JEM-2100F) with the selected area electron diffraction pattern (SAED) function as well as an energy dispersive spectroscopy detector. The surface valence states and elemental compositions were analyzed using X-ray photoelectron spectroscopy (XPS, Thermo Scientific K-Alpha). The Raman signals of samples were identified on a Raman Spectrometer (Renishaw inVia) with an excitation laser wavelength of 514.5 nm. The Mg/V mole ratios in the entire  $\text{MgV}_3\text{O}_8$  were determined by inductively coupled plasma optical emission spectrometer (ICP-OES, Agilent 5110).  $\text{N}_2$  adsorption-desorption isotherms were obtained by using a Micromeritics 3Flex analyzer at the testing temperature of 77 K. The Brunauer-Emmett-Teller method was utilized to calculate the surface areas. The pore size distributions were retrieved by using the Barrett-Joyner-Halanda (BJH) method from the adsorption branch of the isotherms. The thermogravimetry analyses (TGA, Rigaku Thermo plus TG 8120) were carried out from RT to 800 °C with a heating rate of  $10^\circ \text{ C min}^{-1}$  in air.

### **1.3 Electrochemical measurements.**

Half-cell tests were carried out in a 28 °C. The working electrodes were made by mixing the below active materials, poly (vinylidene fluoride) (PVDF) and Super P at a weight ratio of 7:2:1, followed by coating on a piece of Cu foil and drying at 60 °C for 12 h under vacuum condition. The CR2032 coin-type cells were assembled in a glovebox filled with high purity argon ( $\text{H}_2\text{O} < 0.01 \text{ ppm}$ ,  $\text{O}_2 < 0.01 \text{ ppm}$ ). The lithium foil was used as the counter electrode, and the polypropylene film (Celgard-2300) served as the separator. 1 mol  $\text{LiPF}_6$  in a mixture of ethylene carbonate (EC) and diethyl carbonate (DEC), and ethylene methyl carbonate (EMC) with the volume ratio of 1:1:1 was used as the electrolyte. Cyclic voltammetry (CV) test was conducted using the CT2001A battery instrument at a scan rate of 0.2–1.0  $\text{mV s}^{-1}$ . The galvanostatic charge/discharge curves, cycling and rate performances were tested on a NEWARE Automatic Battery Test System in a voltage range of 0.01–3.0 V. The galvanostatic intermittent titration technique (GITT) was used with a current density of 0.1  $\text{A g}^{-1}$  for 10 min followed by

30 min of relaxation time to achieve equilibrium potential on an Ivium Vertex. One Electrochemical Workstation.

## 2. Figures and Tables

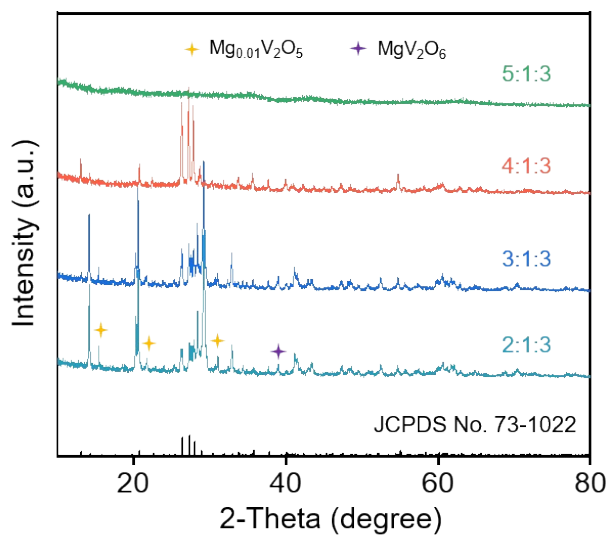

**Fig. S1** The XRD patterns of the products obtained by the solution combustion synthesis with different mole ratio of CAS:Mg:V.

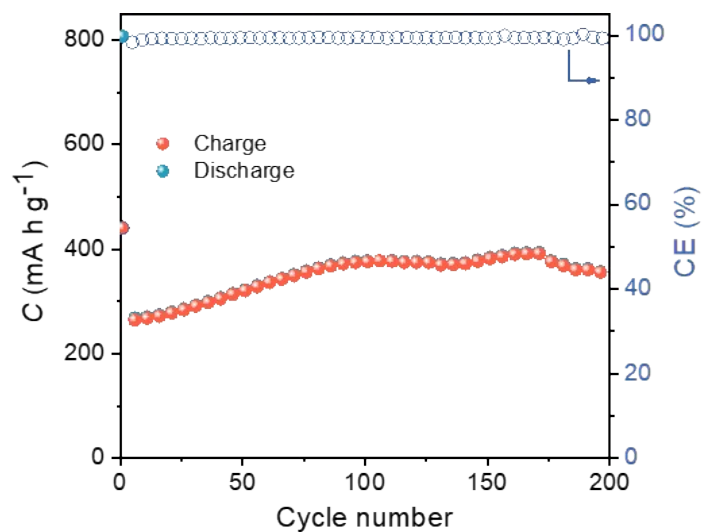

**Fig. S2** Cycle stability of MgV<sub>3</sub>O<sub>8</sub> electrode at 0.2 A g<sup>-1</sup> for 200 cycles.

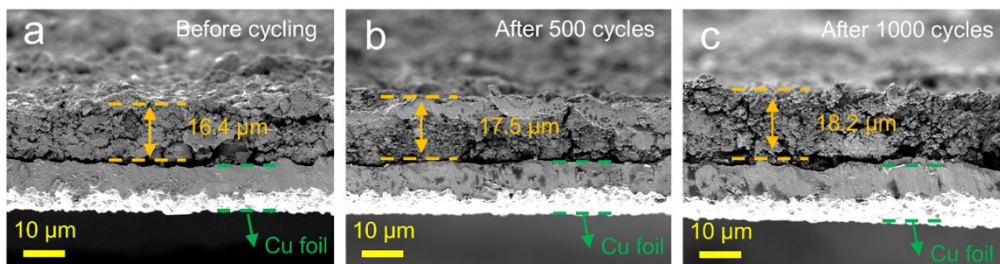

**Fig. S3** Cross-sectional SEM images of MgV<sub>3</sub>O<sub>8</sub> electrode. (a) Before cycling. (b) After 500 cycles. (c) After 1000 cycles for Li-ion storage.

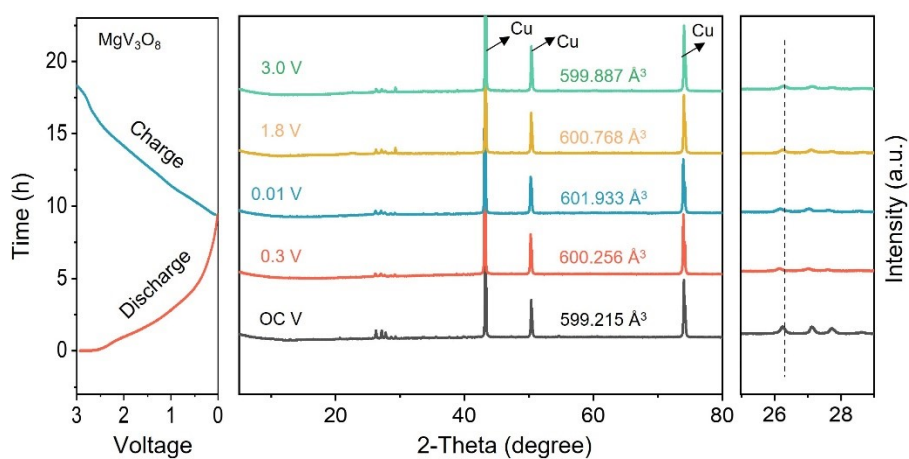

**Fig. S4** *Ex situ* XRD patterns of MgV<sub>3</sub>O<sub>8</sub> at different lithiation/delithiation potentials.

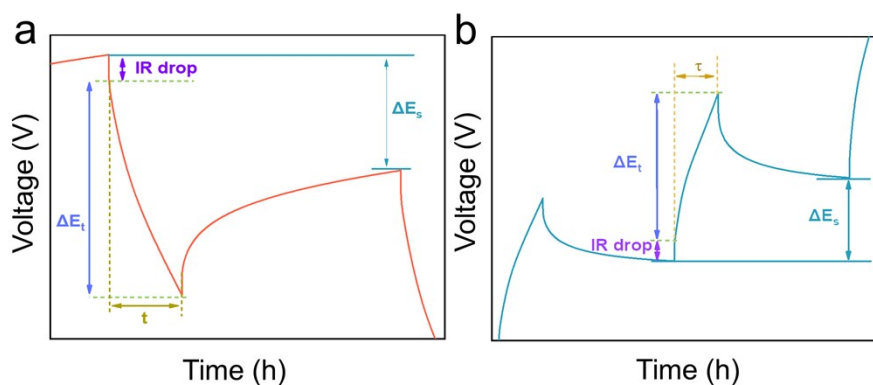

**Fig. S5** Schematic representation of the GITT in (a) discharge, and (b) charge process.  $\tau$ : the relaxation time;  $\Delta E_s$ : voltage change due to the current pulse;  $\Delta E_t$ : voltage change during the current pulse (eliminating the voltage changes after relaxation time).

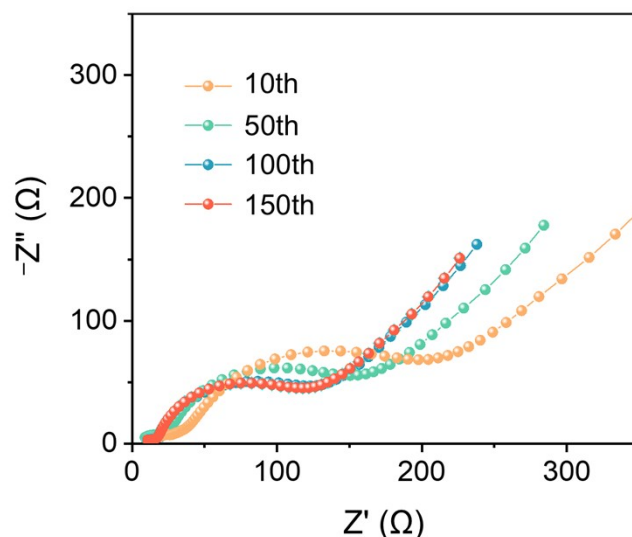

**Fig. S6** EIS spectra of full delithiation (to 3.0 V)  $\text{MgV}_3\text{O}_8$  electrode at different cycles.

**Table S1** XRD Rietveld diffraction refined parameters of  $\text{MgV}_3\text{O}_8$ .

| a = 10.3796(0) Å, b = 8.5470(0) Å, c = 7.7692(3) Å, Volume ( <i>V</i> ) = 600.001 Å <sup>3</sup> , α = γ = 90°, β = 119.481°; Density (ρ) = 4.72 g/cm <sup>3</sup> ; <i>R</i> <sub>wp</sub> = 5.63, <i>R</i> <sub>p</sub> = 4.3, χ <sup>2</sup> = 1.68. |              |           |           |           |           |                                           |
|---------------------------------------------------------------------------------------------------------------------------------------------------------------------------------------------------------------------------------------------------------|--------------|-----------|-----------|-----------|-----------|-------------------------------------------|
| Atom type                                                                                                                                                                                                                                               | Wyckoff site | <i>x</i>  | <i>y</i>  | <i>z</i>  | Occupancy | <i>U</i> <sub>iso</sub> (Å <sup>2</sup> ) |
| Mg1                                                                                                                                                                                                                                                     | 8j           | 0.1285(3) | 0.1923(7) | 0.3013(2) | 0.5       | 0.027                                     |
| V1                                                                                                                                                                                                                                                      | 8j           | 0.1285(3) | 0.1923(7) | 0.3013(2) | 0.5       | 0.027                                     |
| V2                                                                                                                                                                                                                                                      | 4i           | 0.3789(7) | 0         | 0.2232(2) | 1         | 0.015                                     |
| V3                                                                                                                                                                                                                                                      | 4i           | 0.3149(8) | 0.5       | 0.2882(3) | 1         | 0.016                                     |
| O1                                                                                                                                                                                                                                                      | 4g           | 0         | 0.1944(7) | 0         | 1         | 0.044                                     |
| O2                                                                                                                                                                                                                                                      | 8j           | 0.4726(1) | 0.1636(1) | 0.2881(8) | 1         | 0.013                                     |
| O3                                                                                                                                                                                                                                                      | 8j           | 0.2759(0) | 0.3366(9) | 0.376(2)  | 1         | 0.003                                     |
| O4                                                                                                                                                                                                                                                      | 4i           | 0.1943(6) | 0.5       | 0.0374(6) | 1         | 0.025                                     |
| O5                                                                                                                                                                                                                                                      | 4i           | 0.4990(0) | 0.5       | 0.3051(6) | 1         | 0.032                                     |
| O6                                                                                                                                                                                                                                                      | 4i           | 0.2427(7) | 0         | 0.3007(1) | 1         | 0.022                                     |

**Table S2** The ratio of Mg/V in  $\text{MgV}_3\text{O}_8$  powders was tested by ICP-OES.

| Samples                  | Mg/V mole percentage (a.u.) |
|--------------------------|-----------------------------|
| $\text{MgV}_3\text{O}_8$ | 0.338                       |

**Table S3** Performance comparison of MgV<sub>3</sub>O<sub>8</sub> with the reported M (alkaline earth metals)-V-O materials for LIBs.

| Anode                           | Current density (mA g <sup>-1</sup> ) | Capacity (mA h g <sup>-1</sup> ) | Cycles | Fade rate | Volume expansion rate | Ref.     |
|---------------------------------|---------------------------------------|----------------------------------|--------|-----------|-----------------------|----------|
| MgV <sub>3</sub> O <sub>8</sub> | 200                                   | 356.8                            | 200    | ~0%       | 0.34%                 | Our work |
| SrVO <sub>3</sub>               | 200                                   | ~238                             | 200    | ~5%       | 2.30%                 | [1]      |
| CaV <sub>4</sub> O <sub>9</sub> | 1000                                  | 475.8                            | 500    | ~4%       | > 1.34%               | [2]      |

### References

- [1] X. Li, Z. Lin, N. Jin, X. Yang, Y. Du, L. Lei, P. Rozier, P. Simon, Y. Liu, *Adv. Mater.*, 2022, **34**, 2107262.
- [2] P. Wu, X. Xu, Y. Wu, F. Xu, X. Wang, J. Meng, C. Han, X. Liu, Z. Zhu, L. Mai, *Adv. Energy Mater.*, 2021, **11**, 2003612.
